# Supplementary material for: Combination of CT and telomerase+ circulating tumor cells improves diagnosis of small pulmonary nodules
Source: PubMed Central journal article supplement (PMC8262359; doi:10.1172/jci.insight.148182), 2021-06-08
Supplement: jciinsight-6-148182-s089.pdf [file jciinsight-6-148182-s089.pdf]

## Supplementary Figure and Legend

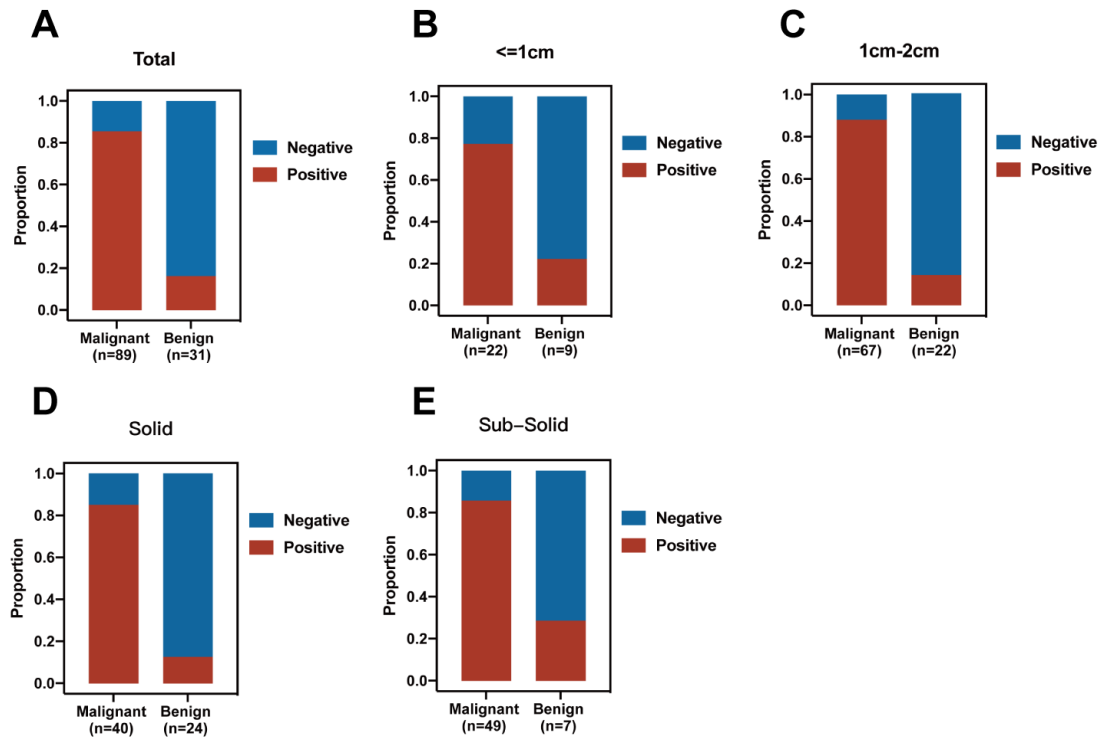

Supplementary Figure 1. Positive rate of CTC sample test.

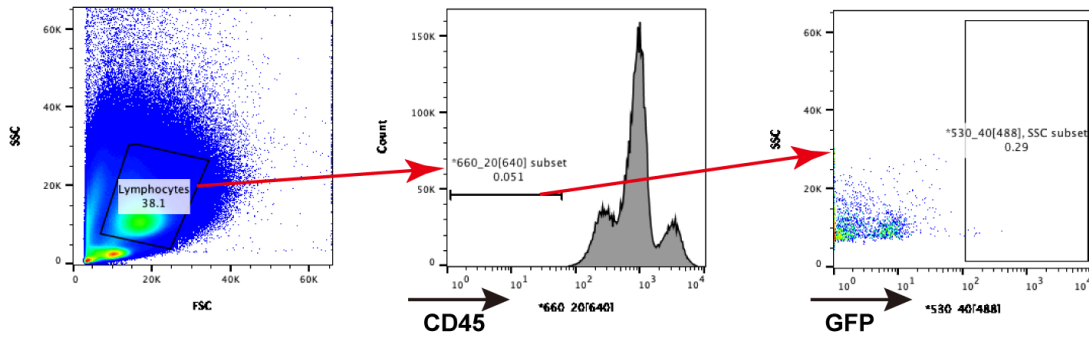

Supplementary Figure 2. Flow analysis of CTC sample detection.

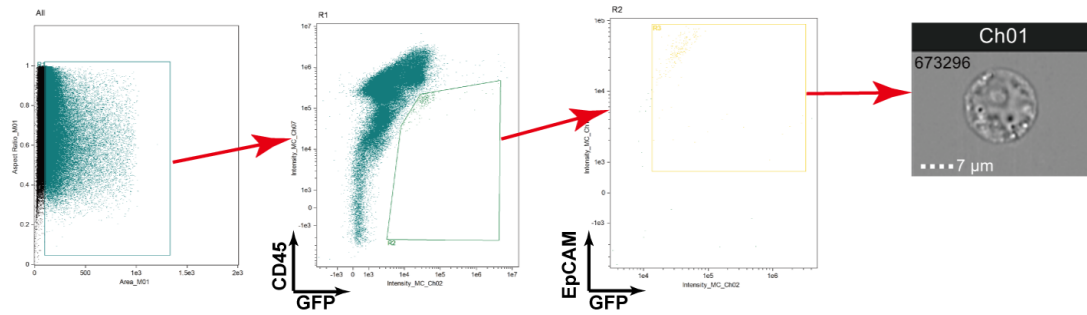

Supplementary Figure 3. FlowSight analysis of CTC sample detection.

### Supplement Table

Supplementary Table 1. The number of CTCs for each enrolled patient.

| NO | CTC number<br>per 4ml PB | CT (diameter<br>mm) | Density         | Type      |
|----|--------------------------|---------------------|-----------------|-----------|
| 1  | 1                        | 0.9                 | Solid nodule    | Malignant |
| 2  | 4                        | 2                   | Subsolid nodule | Malignant |
| 3  | 11                       | 0.8                 | Subsolid nodule | Malignant |
| 4  | 7                        | 0.6                 | Subsolid nodule | Malignant |
| 5  | 20                       | 1.1                 | Solid nodule    | Malignant |
| 6  | 6                        | 1.7                 | Subsolid nodule | Malignant |
| 7  | 14                       | 1.3                 | Subsolid nodule | Malignant |
| 8  | 6                        | 1.2                 | Solid nodule    | Malignant |
| 9  | 10                       | 0.6                 | Subsolid nodule | Malignant |
| 10 | 1                        | 2                   | Subsolid nodule | Malignant |
| 11 | 8                        | 2                   | Solid nodule    | Malignant |
| 12 | 2                        | 2                   | Solid nodule    | Malignant |
| 13 | 3                        | 1                   | Solid nodule    | Malignant |
| 14 | 4                        | 2                   | Solid nodule    | Malignant |
| 15 | 8                        | 1.5                 | Subsolid nodule | Malignant |
| 16 | 4                        | 1.9                 | Solid nodule    | Malignant |
| 17 | 6                        | 0.6                 | Subsolid nodule | Malignant |

---

|    |    |     |                 |           |
|----|----|-----|-----------------|-----------|
| 18 | 5  | 1.6 | Subsolid nodule | Malignant |
| 19 | 2  | 1.5 | Subsolid nodule | Malignant |
| 20 | 5  | 1   | Solid nodule    | Malignant |
| 21 | 3  | 2   | Solid nodule    | Malignant |
| 22 | 5  | 1.1 | Solid nodule    | Malignant |
| 23 | 2  | 1.9 | Subsolid nodule | Malignant |
| 24 | 6  | 1.8 | Subsolid nodule | Malignant |
| 25 | 3  | 1   | Subsolid nodule | Malignant |
| 26 | 3  | 0.8 | Subsolid nodule | Malignant |
| 27 | 5  | 1.5 | Subsolid nodule | Malignant |
| 28 | 3  | 1.3 | Subsolid nodule | Malignant |
| 29 | 23 | 1.3 | Subsolid nodule | Malignant |
| 30 | 1  | 1.2 | Solid nodule    | Malignant |
| 31 | 2  | 1.5 | Subsolid nodule | Malignant |
| 32 | 2  | 1.1 | Subsolid nodule | Malignant |
| 33 | 3  | 1.5 | Subsolid nodule | Malignant |
| 34 | 7  | 1.6 | Subsolid nodule | Malignant |
| 35 | 12 | 1   | Subsolid nodule | Malignant |
| 36 | 3  | 1.4 | Solid nodule    | Malignant |
| 37 | 3  | 0.8 | Subsolid nodule | Malignant |
| 38 | 2  | 1.3 | Solid nodule    | Malignant |
| 39 | 4  | 1.4 | Solid nodule    | Malignant |
| 40 | 0  | 0.5 | Subsolid nodule | Malignant |
| 41 | 0  | 0.9 | Subsolid nodule | Malignant |
| 42 | 0  | 1.2 | Solid nodule    | Malignant |
| 43 | 3  | 1.9 | Solid nodule    | Malignant |
| 44 | 3  | 1.9 | Subsolid nodule | Malignant |
| 45 | 5  | 1.3 | Solid nodule    | Malignant |
| 46 | 5  | 1.3 | Subsolid nodule | Malignant |
| 47 | 12 | 2   | Subsolid nodule | Malignant |
| 48 | 0  | 2   | Subsolid nodule | Malignant |
| 49 | 4  | 0.7 | Subsolid nodule | Malignant |
| 50 | 5  | 1.3 | Solid nodule    | Malignant |

---

---

|    |    |     |                 |           |
|----|----|-----|-----------------|-----------|
| 51 | 5  | 1.4 | Subsolid nodule | Malignant |
| 52 | 2  | 2   | Subsolid nodule | Malignant |
| 53 | 0  | 1   | Subsolid nodule | Malignant |
| 54 | 3  | 2   | Solid nodule    | Malignant |
| 55 | 6  | 1.8 | Solid nodule    | Malignant |
| 56 | 0  | 1.3 | Solid nodule    | Malignant |
| 57 | 2  | 1.9 | Solid nodule    | Malignant |
| 58 | 2  | 1.9 | Solid nodule    | Malignant |
| 59 | 40 | 1.5 | Solid nodule    | Malignant |
| 60 | 3  | 1.7 | Solid nodule    | Malignant |
| 61 | 6  | 1   | Solid nodule    | Malignant |
| 62 | 9  | 1.9 | Subsolid nodule | Malignant |
| 63 | 10 | 1.8 | Solid nodule    | Malignant |
| 64 | 14 | 1.1 | Subsolid nodule | Malignant |
| 65 | 4  | 1   | Solid nodule    | Malignant |
| 66 | 0  | 2   | Solid nodule    | Malignant |
| 67 | 6  | 1.2 | Solid nodule    | Malignant |
| 68 | 2  | 1.5 | Subsolid nodule | Malignant |
| 69 | 2  | 1.9 | Solid nodule    | Malignant |
| 70 | 2  | 1.5 | Solid nodule    | Malignant |
| 71 | 7  | 1.8 | Solid nodule    | Malignant |
| 72 | 47 | 2   | Solid nodule    | Malignant |
| 73 | 1  | 1.8 | Solid nodule    | Malignant |
| 74 | 8  | 1.7 | Solid nodule    | Malignant |
| 75 | 2  | 1.6 | Subsolid nodule | Malignant |
| 76 | 4  | 1.3 | Subsolid nodule | Malignant |
| 77 | 1  | 1.1 | Subsolid nodule | Malignant |
| 78 | 11 | 1   | Solid nodule    | Malignant |
| 79 | 7  | 0.8 | Subsolid nodule | Malignant |
| 80 | 3  | 1.2 | Subsolid nodule | Malignant |
| 81 | 0  | 1   | Subsolid nodule | Malignant |
| 82 | 2  | 1   | Subsolid nodule | Malignant |
| 83 | 40 | 1   | Subsolid nodule | Malignant |

---

---

|     |    |     |                 |           |
|-----|----|-----|-----------------|-----------|
| 84  | 3  | 1.5 | Solid nodule    | Malignant |
| 85  | 5  | 1.6 | Subsolid nodule | Malignant |
| 86  | 7  | 1.2 | Subsolid nodule | Malignant |
| 87  | 6  | 1.6 | Solid nodule    | Malignant |
| 88  | 6  | 1.2 | Subsolid nodule | Malignant |
| 89  | 4  | 2   | Subsolid nodule | Malignant |
| 90  | 1  | 1   | Solid nodule    | Benign    |
| 91  | 0  | 1.6 | Solid nodule    | Benign    |
| 92  | 1  | 1.2 | Solid nodule    | Benign    |
| 93  | 0  | 1.4 | Solid nodule    | Benign    |
| 94  | 0  | 2   | Solid nodule    | Benign    |
| 95  | 0  | 2   | Solid nodule    | Benign    |
| 96  | 1  | 0.7 | Solid nodule    | Benign    |
| 97  | 1  | 0.8 | Subsolid nodule | Benign    |
| 98  | 0  | 1.1 | Solid nodule    | Benign    |
| 99  | 3  | 0.4 | Solid nodule    | Benign    |
| 100 | 0  | 1.6 | Solid nodule    | Benign    |
| 101 | 3  | 0.8 | Subsolid nodule | Benign    |
| 102 | 1  | 1   | Solid nodule    | Benign    |
| 103 | 0  | 0.6 | Solid nodule    | Benign    |
| 104 | 0  | 2   | Solid nodule    | Benign    |
| 105 | 0  | 0.8 | Solid nodule    | Benign    |
| 106 | 12 | 1.5 | Solid nodule    | Benign    |
| 107 | 1  | 2   | Solid nodule    | Benign    |
| 108 | 1  | 1.8 | Solid nodule    | Benign    |
| 109 | 1  | 1.1 | Subsolid nodule | Benign    |
| 110 | 1  | 1.1 | Subsolid nodule | Benign    |
| 111 | 0  | 0.6 | Subsolid nodule | Benign    |
| 112 | 6  | 1.5 | Subsolid nodule | Benign    |
| 113 | 0  | 1.5 | Solid nodule    | Benign    |
| 114 | 1  | 2   | Solid nodule    | Benign    |
| 115 | 0  | 1.4 | Solid nodule    | Benign    |
| 116 | 3  | 1.1 | Solid nodule    | Benign    |

---

|     |   |     |                 |        |
|-----|---|-----|-----------------|--------|
| 117 | 1 | 1.4 | Subsolid nodule | Benign |
| 118 | 1 | 1.9 | Solid nodule    | Benign |
| 119 | 1 | 1.1 | Solid nodule    | Benign |
| 120 | 0 | 2   | Solid nodule    | Benign |

Supplyment Table 2. ROC analysis of CTCs in the pulmonary nodule patients with different diameter.

|                           | All patients | ≤1cm nodule | 1-2 cm nodule |
|---------------------------|--------------|-------------|---------------|
| AUC                       | 0.843        | 0.798       | 0.858         |
| 95%CI                     | 0.759-0.927  | 0.644-0.952 | 0.753-0.963   |
| Best Cut-off Value        | 1.5          | 1.5         | 1.5           |
| Sensitivity               | 0.8539       | 0.7727      | 0.8806        |
| Specificity               | 0.8387       | 0.7778      | 0.8636        |
| Negative Predictive Value | 0.6667       | 0.5833      | 0.7037        |
| Positive Predictive Value | 0.9383       | 0.8947      | 0.9516        |
| True Positive Rate        | 0.8539       | 0.7727      | 0.8806        |
| False Positive Rate       | 0.1613       | 0.2222      | 0.1364        |
| True Negatice Rate        | 0.8387       | 0.7778      | 0.8636        |
| False Negative Rate       | 0.1461       | 0.22723     | 0.1194        |
| False Discovery Rate      | 0.0617       | 0.1053      | 0.0484        |
| Accuracy                  | 0.85         | 0.7742      | 0.8764        |
| Precision                 | 0.9383       | 0.8947      | 0.9516        |
| Youden Index              | 1.6926       | 1.5505      | 1.7442        |

Supplementary Table 3. Correlations between CTCs and tumor biomarkers.

|                  | CTC correlation |                  |      |
|------------------|-----------------|------------------|------|
|                  | Pearson r       | 95% CI           | p    |
| CEA (n=86)       | 0.11            | -0.108 to 0.312  | 0.33 |
| NSE (n=89)       | 0.08            | -0.127 to 0.287  | 0.44 |
| pro-GRP (n=88)   | -0.08           | -0.282 to 0.135  | 0.48 |
| CYRFA21-1 (n=89) | -0.03           | -0.234 to 0.182  | 0.80 |
| Diameter (n=89)  | -0.02           | -0.224 to 0.1193 | 0.88 |

Supplementary Table 4. ROC analysis of the number of CTCs, the expression levels of CEA, NSE, pro-GRP, and CYFRA21-1 in the pulmonary nodule patients enrolled.

|           | AUC   | 95% CI      | Accuracy | Precision | Youden Index | p       |
|-----------|-------|-------------|----------|-----------|--------------|---------|
| CTCs      | 0.843 | 0.759-0.927 | 0.85     | 0.9383    | 1.6926       | /       |
| CEA       | 0.524 | 0.412-0.637 | 0.4417   | 0.8929    | 1.1841       | <0.0001 |
| NSE       | 0.530 | 0.414-0.646 | 0.5      | 0.8537    | 1.1997       | <0.0001 |
| pro-GRP   | 0.502 | 0.375-0.629 | 0.7083   | 0.77      | 1.1232       | <0.0001 |
| CYFRA21-1 | 0.559 | 0.445-0.673 | 0.4333   | 0.8621    | 1.1519       | 0.0001  |
